# Supplementary material for: Exploration of a Novel Circadian miRNA Pair Signature for Predicting Prognosis of Lung Adenocarcinoma
Source: MDPI journal article supplement (doi:10.3390/cancers14205106), 2022-10-18
Supplement: s1 [file s1]

# **Exploration of a Novel Circadian miRNA Pair Signature for Predicting Prognosis of Lung Adenocarcinoma**

Zhengrong Yin<sup>1,2†</sup>, Jingjing Deng<sup>1,2†</sup>, Mei Zhou<sup>1,2</sup>, Minglei Li<sup>1,2</sup>, E Zhou<sup>1,2</sup>, Jiatong Liu<sup>1,2</sup>, Zhe Jia<sup>1,2</sup>, Guanghai Yang<sup>3\*</sup>, Yang Jin<sup>1,2\*</sup>

<sup>1</sup>Department of Respiratory and Critical Care Medicine, Hubei Province Clinical Research Center for Major Respiratory Diseases, NHC Key Laboratory of Pulmonary Diseases, Union Hospital, Tongji Medical College, Huazhong University of Science and Technology, Wuhan 430022, China.

<sup>2</sup>Hubei Province Engineering Research Center for Tumor-Targeted Biochemotherapy, MOE Key Laboratory of Biological Targeted Therapy, Union Hospital, Tongji Medical College, Huazhong University of Science and Technology, Wuhan 430022, China.

<sup>3</sup>Department of Thoracic Surgery, Union Hospital, Tongji Medical College, Huazhong University of Science and Technology, Wuhan 430022, China.

## **Supplementary materials**

**Table S1. The forward primer sequences of 11 cmiRNA in the prognostic model used in quantitative real-time polymerase chain reaction (qRT-PCR) analysis.**

**Table S2. The list of circadian genes downloaded from the Circadian Gene Database (Supplied in a separate Excel file, Table S2).**

**Table S3. The list of miRNAs in TCGA-LUAD and GSE63805 cohort and circadian miRNAs predicted by miRDB and miRDIP databases (Supplied in a separate Excel file, Table S3).**

**Table S4. cmiRNA pairs associated with prognosis obtained by Univariate COX**

**regression analysis ( $p < 0.01$ ).**

**Table S5. Corresponding cmiRNAs in the prognostic model in TCGA-LUAD and GSE63805 cohort.**

**Table S6. Expression levels of miRNA of the model and its targeted genes in tumor tissue (compared with normal tissues) in TCGA-LUAD cohort.**

**Table S7. cmiRNAs of the prognostic model and corresponding target Cgenes (Supplied in a separate Excel file, Table S7).**

**Figure S1. Analysis of immune cells between the high- and low-risk group.**

**Figure S2. Gene Set Enrichment Analysis (GSEA) between the high- and low-risk group.**

**Table S1. The forward primer sequences of 11 cmiRNA in the prognostic model used in quantitative real-time polymerase chain reaction (qRT-PCR) analysis.**

| <b>miRNA</b>    | <b>forward primer sequences</b> |
|-----------------|---------------------------------|
| hsa-miR-584-5p  | AAGTTGCATTATGGTTTGCCTGG         |
| hsa-miR-539-3p  | CCTGCTGGATCATACAAGGACAA         |
| hsa-miR-382-5p  | AACGGCGAAGTTGTTCGTGG            |
| hsa-miR-376a-3p | GCGCATCATAGAGGAAAATCCACGT       |
| hsa-miR-335-5p  | ATGCGCTCAAGAGCAATAACGA          |
| hsa-miR-31-5p   | AACACGCAGGCAAGATGCTG            |
| hsa-miR-215-5p  | GCGGCCTGATGACCTATGAATT          |
| hsa-miR-153-3p  | AGCTGGACTTGCATAGTCACAAA         |
| hsa-miR-138-5p  | AATTGCTCAGCTGGTGTTGTGA          |
| hsa-miR-136-5p  | AAGCGCCTACTCCATTTGTTTTG         |
| hsa-miR-133b    | ACCGTCTTTGGTCCCCTTCAA           |

**Table S4. cmiRNA pairs associated with prognosis obtained by Univariate COX regression analysis ( $p < 0.01$ ).**

| id                              | HR          | HR.95L      | HR.95H      | <i>p</i> value |
|---------------------------------|-------------|-------------|-------------|----------------|
| hsa-miR-1301-3p hsa-miR-31-5p   | 0.413999396 | 0.259152073 | 0.66137036  | 0.000224451    |
| hsa-miR-590-5p hsa-miR-31-5p    | 0.403672516 | 0.252108247 | 0.646355296 | 0.000158758    |
| hsa-miR-628-5p hsa-miR-31-5p    | 0.401853234 | 0.250326331 | 0.645102019 | 0.000159942    |
| hsa-miR-503-5p hsa-miR-31-5p    | 0.498869725 | 0.317389351 | 0.784118946 | 0.002578261    |
| hsa-miR-139-5p hsa-miR-584-5p   | 0.455970827 | 0.288842241 | 0.719802597 | 0.000747842    |
| hsa-miR-539-3p hsa-miR-376a-3p  | 2.047587084 | 1.299731036 | 3.225754215 | 0.00199842     |
| hsa-miR-153-3p hsa-miR-133b     | 2.044139653 | 1.222537035 | 3.417898028 | 0.006409482    |
| hsa-miR-584-5p hsa-miR-335-5p   | 2.269786156 | 1.248127997 | 4.127725047 | 0.00722347     |
| hsa-miR-409-5p hsa-miR-31-5p    | 0.510762588 | 0.326515364 | 0.798977476 | 0.00324996     |
| hsa-miR-409-3p hsa-miR-31-5p    | 0.435636034 | 0.277673898 | 0.683459107 | 0.000298863    |
| hsa-miR-187-3p hsa-miR-31-5p    | 0.423664851 | 0.266291945 | 0.674041815 | 0.000289022    |
| hsa-miR-187-3p hsa-miR-215-5p   | 0.51737803  | 0.331035031 | 0.808615405 | 0.003823657    |
| hsa-miR-508-3p hsa-miR-31-5p    | 0.481034758 | 0.308091077 | 0.751058553 | 0.001285116    |
| hsa-miR-432-5p hsa-miR-31-5p    | 0.523238595 | 0.333715601 | 0.820395051 | 0.00476216     |
| hsa-miR-136-5p hsa-miR-31-5p    | 0.425624582 | 0.266537943 | 0.679664152 | 0.000347522    |
| hsa-miR-136-5p hsa-miR-382-5p   | 0.467632002 | 0.294520979 | 0.742492743 | 0.001272174    |
| hsa-miR-138-5p hsa-miR-31-5p    | 0.339818315 | 0.210702981 | 0.548053409 | 9.60E-06       |
| hsa-miR-196b-5p hsa-miR-151a-5p | 1.853672806 | 1.162394144 | 2.956056592 | 0.009543416    |
| hsa-miR-33a-5p hsa-miR-31-5p    | 0.415053516 | 0.252430082 | 0.682444104 | 0.000528495    |
| hsa-miR-335-5p hsa-miR-31-5p    | 0.345515885 | 0.218742488 | 0.545761493 | 5.21E-06       |
| hsa-miR-335-5p hsa-miR-215-5p   | 0.472672695 | 0.284548304 | 0.785172407 | 0.003803736    |
| hsa-miR-758-3p hsa-miR-31-5p    | 0.463314163 | 0.29628723  | 0.724499714 | 0.000744079    |
| hsa-miR-31-5p hsa-miR-93-3p     | 2.714016346 | 1.704354779 | 4.321802491 | 2.60E-05       |
| hsa-miR-31-5p hsa-miR-382-5p    | 2.405022745 | 1.528351537 | 3.784557587 | 0.000148371    |
| hsa-miR-31-5p hsa-miR-326       | 1.995031156 | 1.251141308 | 3.181214852 | 0.003718432    |
| hsa-miR-31-5p hsa-miR-133a-3p   | 2.086912141 | 1.336857297 | 3.257791461 | 0.001205333    |

The cmiRAN pairs finally included in the model are marked in red.

**Table S5. Corresponding miRNAs in the prognostic model in TCGA-LUAD and GEO cohort.**

| TCGA-LUAD cohort | GSE63805 cohort |
|------------------|-----------------|
| hsa-miR-539-3p   | hsa-miR-539     |
| hsa-miR-153-3p   | hsa-miR-153     |
| hsa-miR-584-5p   | hsa-miR-584     |
| hsa-miR-136-5p   | hsa-miR-136     |
| hsa-miR-138-5p   | hsa-miR-138     |
| hsa-miR-335-5p   | hsa-miR-335     |
| hsa-miR-376a-3p  | hsa-miR-376a    |
| hsa-miR-133b     | hsa-miR-133b    |
| hsa-miR-382-5p   | hsa-miR-382     |
| hsa-miR-31-5p    | hsa-miR-31      |
| hsa-miR-215-5p   | hsa-miR-215     |

**Table S6. Expression levels of miRNA of the model and its targeted genes in tumor tissue (compared with normal tissues) in TCGA-LUAD cohort.**

| ID              | LogFC | <i>p</i> value | ID       | LogFC | <i>p</i> value |
|-----------------|-------|----------------|----------|-------|----------------|
| hsa-miR-539-3p  | 1.44  | 4.52E-04       | NINJ1    | 0.26  | 2.99E-03       |
| hsa-miR-153-3p  | 1.30  | 4.38E-06       | CCDC85C  | -0.11 | 5.66E-04       |
| hsa-miR-584-5p  | -1.11 | 2.87E-09       | KDSR     | -0.36 | 3.00E-15       |
| hsa-miR-136-5p  | 2.32  | 1.73E-16       | DDIT4    | 1.23  | 7.51E-09       |
| hsa-miR-138-5p  | -1.12 | 6.44E-07       | OTUD4    | -0.13 | 7.15E-04       |
| hsa-miR-335-5p  | -1.04 | 3.13E-13       | RPL22    | 0.17  | 1.07E-02       |
| hsa-miR-376a-3p | 1.61  | 7.85E-05       | INHBB    | 1.21  | 2.40E-04       |
| hsa-miR-133b    | -2.39 | 5.36E-31       | QKI      | -1.17 | 3.03E-30       |
| hsa-miR-382-5p  | 1.32  | 1.34E-07       | ZNF704   | -0.65 | 8.09E-13       |
| hsa-miR-31-5p   | 4.91  | 5.15E-18       | GAB1     | -1.16 | 3.80E-27       |
| hsa-miR-215-5p  | 3.06  | 2.23E-09       | ZBTB34   | -0.12 | 4.76E-05       |
| LHFPL6          | -1.55 | 7.42E-31       | RHOBTB1  | -0.18 | 8.06E-06       |
| TAGLN2          | 0.34  | 5.10E-04       | FAM53B   | -0.61 | 2.08E-14       |
| UBA2            | 0.56  | 1.02E-09       | LATS2    | -1.05 | 8.34E-26       |
| DUSP1           | -1.46 | 8.44E-22       | VEZT     | 0.55  | 1.33E-13       |
| KIF3C           | 1.23  | 5.56E-08       | BACH2    | -0.52 | 1.81E-07       |
| YES1            | 0.27  | 5.71E-02       | SEPHS1   | 0.32  | 1.48E-06       |
| RFFL            | 0.57  | 3.07E-11       | FBXO28   | 0.63  | 5.24E-18       |
| ELAVL1          | 0.36  | 1.21E-17       | KDM4C    | -0.03 | 2.67E-03       |
| SHISA5          | 0.17  | 5.33E-03       | BRWD1    | 0.51  | 4.47E-03       |
| RABGAP1L        | -0.25 | 1.36E-06       | CRISPLD2 | -0.49 | 1.18E-02       |
| DOCK5           | 0.57  | 5.10E-02       | XPR1     | 2.05  | 2.00E-30       |
| RMND5A          | -0.08 | 1.64E-03       | PLAG1    | 0.38  | 7.79E-01       |
| RARA            | -0.48 | 3.73E-11       | TOP1     | 0.50  | 7.97E-12       |
| KLF11           | -0.57 | 4.81E-15       | ATP1B1   | 1.40  | 8.89E-16       |
| ROCK2           | -0.04 | 2.13E-02       | NR1D2    | -0.11 | 1.15E-01       |
| EID1            | -0.54 | 7.35E-19       | CD200    | -0.44 | 9.98E-05       |
| GNG2            | -0.71 | 5.05E-14       | PPIL1    | 1.17  | 7.67E-26       |
| SEH1L           | 0.52  | 2.38E-11       | SH3PXD2A | 0.47  | 7.15E-06       |
| NSFL1C          | 0.29  | 2.53E-06       |          |       |                |

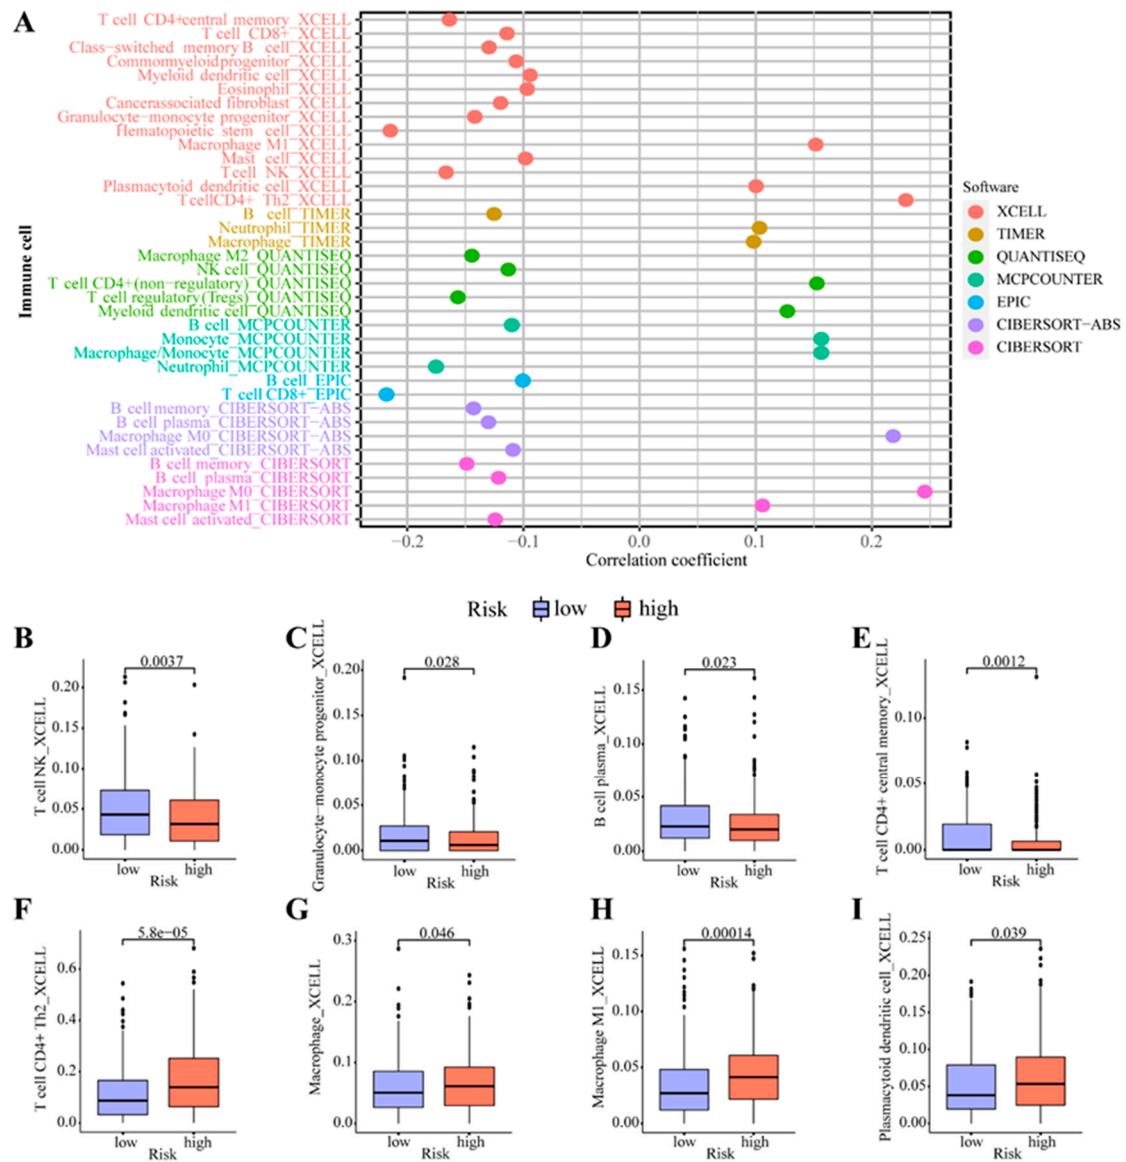

**Figure S1. Analysis of immune cells between the high- and low-risk group**

(A) Overview of significant correlation between risk score and immune cells by Spearman correlation analysis ( $p < 0.05$ ). (B-I) Comparison of level of representative immune cells between the high- and low-risk group.

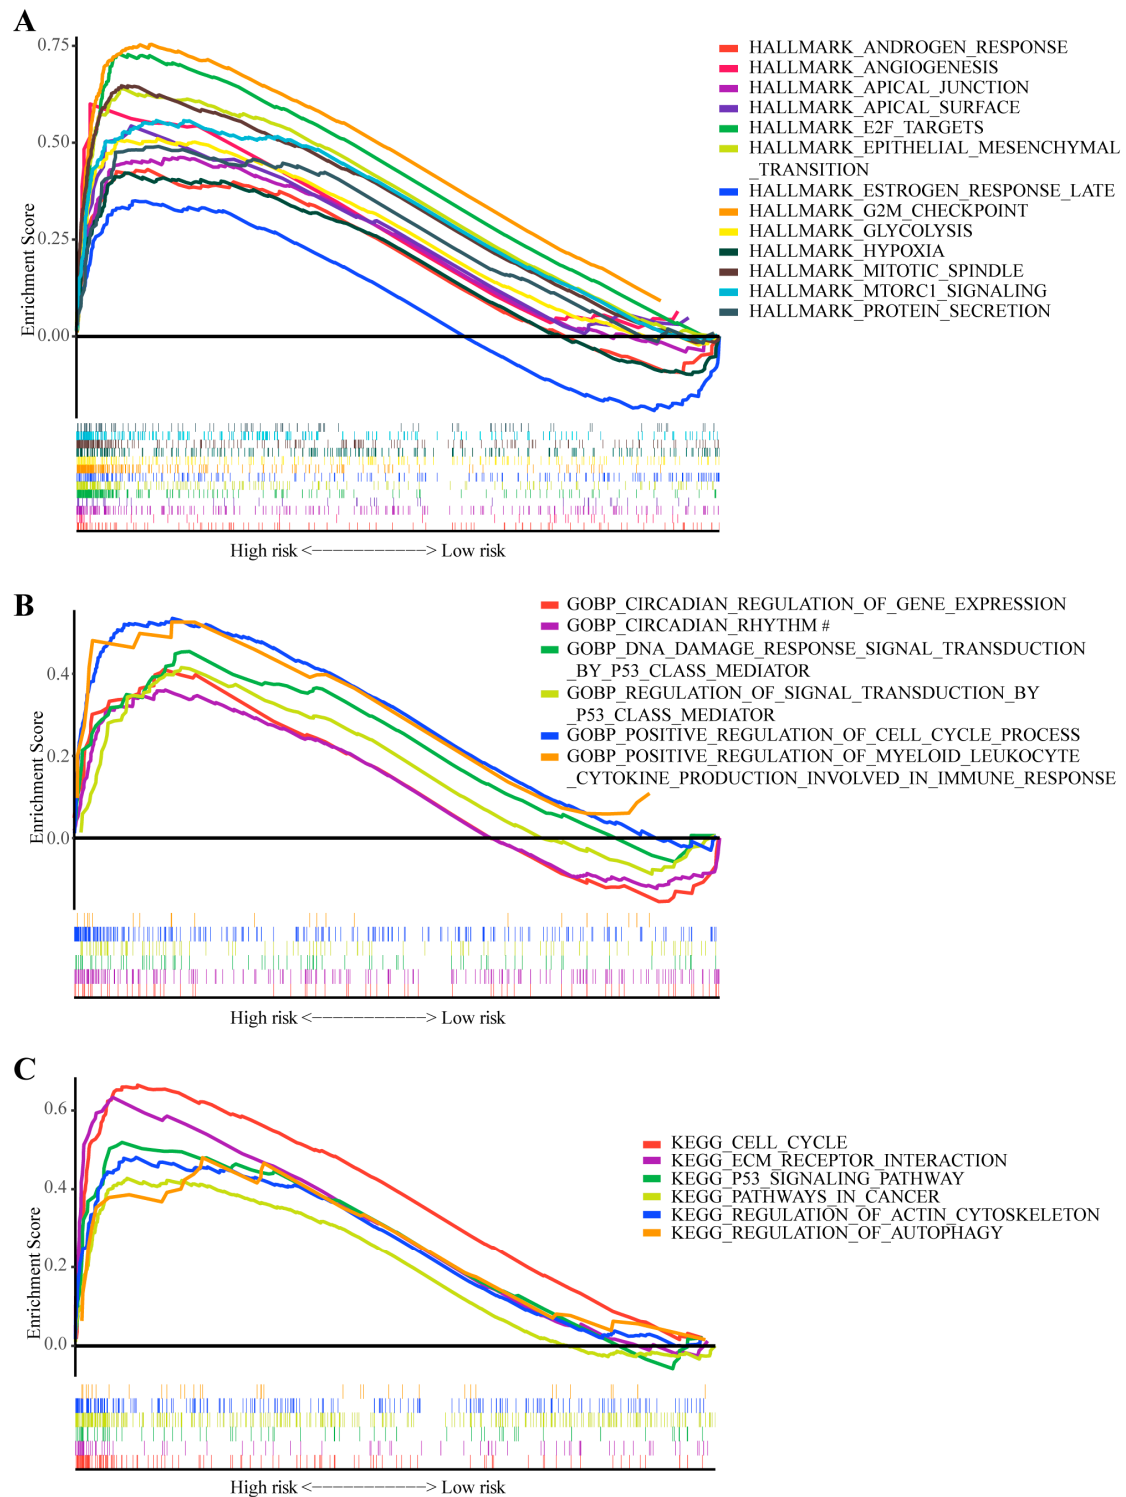

**Figure S2. Gene Set Enrichment Analysis (GSEA) between the high- and low-risk group**

GSEA plots depict the significant enrichment ( $FDR < 0.05$ ) of **(A)** classical cancer hallmark gene sets and **(B, C)** other typical gene sets of tumor-related biological processes between the high- and low-risk group. (#  $FDR = 0.051$ ).
